# Supplementary material for: In situ synthesis of Co2P-decorated red phosphorus nanosheets for efficient photocatalytic H2 evolution
Source: Royal Society of Chemistry journal article supplement (doi:10.1039/d0cy00107d), 2020-01-01
Supplement: d0cy00107d1.pdf [file d0cy00107d1.pdf]

## Supporting Information

### **In-situ synthesis of Co<sub>2</sub>P decorated red phosphorus nanosheets for efficient photocatalytic H<sub>2</sub> evolution**

Chenyang Li<sup>a</sup>, Mian Fu<sup>a</sup>, Yan Wang<sup>a</sup>, Enzhou Liu<sup>a\*</sup>, Jun Fan<sup>a</sup>, Xiaoyun Hu<sup>b\*</sup>

<sup>a</sup>School of Chemical Engineering, Northwest University, Xi'an 710069, P. R. China.

<sup>b</sup>School of Physics, Northwest University, Xi'an 710069, P. R. China.

\*e-mail address: ok.208@163.com and hxy3275@nwu.edu.cn

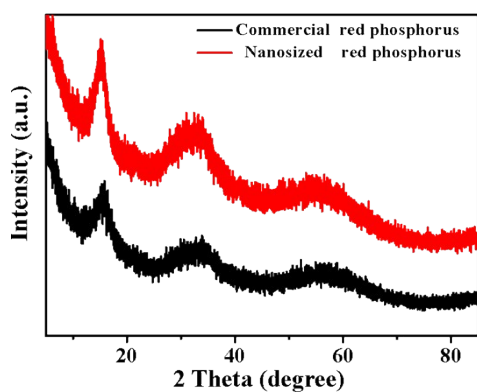

Fig. S1 XRD of different kinds of red phosphorus.

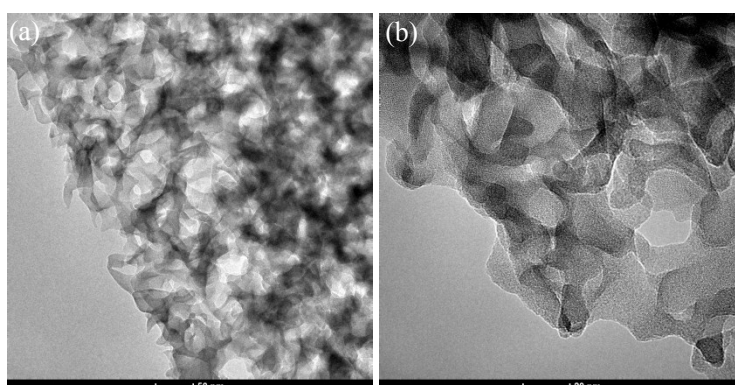

Fig. S2 (a)~(b) Nanostructure of two-dimension honeycomb red phosphorus.

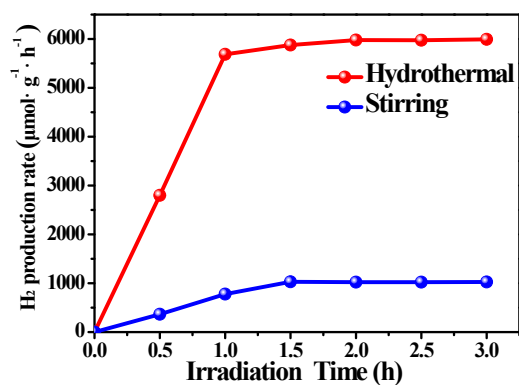

Fig. S3 The rate of photocatalytic H<sub>2</sub> evolution of 2% Co<sub>2</sub>P/RP synthesized by different methods.

## Characterization techniques

The crystalline structures were identified by a Shimadzu XRD-6000 powder diffractometer. Morphological and structural of the samples were investigated using scanning electron microscopy (SEM, Carl Zeiss SIGMA) and transmission electron microscopy (TEM, Tecnai G2 F20 STWIN). UV-vis diffuse reflectance spectra (DRS) were recorded on a Shimadzu UV-3600 UV/vis/NIR spectrophotometer using BaSO<sub>4</sub> as reference. Photoluminescence (PL) spectra were

recorded on a Hitachi-F 7000 fluorescence spectrophotometer. The specific surface areas were surveyed by N<sub>2</sub> adsorption/desorption in the instrument (Quantachrome, SI). X-ray photoelectron spectroscopy (XPS) were carried out using a Kratos AXIS NOVA spectrometer.

### **Photocatalytic hydrogen production**

Photocatalytic hydrogen production was carried out in a top-irradiated reaction vessel connected to an on-line analysis system (Beijing Perfect Light Technology Co. Ltd., China, LabSobar-IIIAG). A 300W Xe lamp equipped was employed as the light source. In a typical process, 30 mg of photocatalyst powder was dispersed in the reactor with 100 mL of aqueous solution, containing 0.35 mol L<sup>-1</sup> Na<sub>2</sub>SO<sub>3</sub> and 0.15 mol L<sup>-1</sup> Na<sub>2</sub>S as the sacrificial agent. The temperature of the reaction solution was carefully maintained at 6 °C by a low constant temperature bath (Shanghai hengpin Technology Co. Ltd., China, DC-0506). Prior to irradiation, the reaction system was evacuated for 30 min to eliminate dissolved oxygen. The produced hydrogen was in-situ obtained every 30 min using an online gas chromatograph (GC 7900, Techcomp Shanghai Co. Ltd., China). The photocatalytic hydrogen evolution of Pt/RP was conducted by photo-decomposition. In detail: certain volume of H<sub>2</sub>PtCl<sub>6</sub>·6H<sub>2</sub>O (1 g/L) was added to reaction vessel containing 100 ml sacrificial agent, then 30 mg RP was dispersed the mixed solution followed by irradiation for 3 h. To test the stability of the samples, a cycling experiment was performed in which after 3 hours testing, the vacuum was re-extracted and maintained in the same conditions as at the beginning of the experiment, repeat the above measurement activity. More importantly, the residual H<sub>2</sub> was removed by purging with nitrogen gas for 30 min before starting every new cycle.

### **Photoelectrochemical analyses**

Photoelectrochemical analyses, including transient photocurrent (I-t curve, at 0.5 V potential vs. SCE), electrochemical impedance analysis (EIS, at 0.5 V potential vs. SCE), were conducted on an electrochemical workstation (CHI660E) equipped with a typical three electrode cell under 300W Xenon lamp and bubbling with N<sub>2</sub> before measurement, in which the working electrode, counter electrode and reference electrode were photoanode, Pt, and saturated calomel electrode,

respectively. Typically, the working electrodes were fabricated by dripping the mixed solution directly onto an FTO conductive glass surface and naturally drying at 25 °C; that is, 3 mg of sample was added into 3 mL of mixed solution (the volume ratio of ethanol/water is 1:1) and ultrasonically treated several times. Besides, the electrolyte solution and irradiation area was Na<sub>2</sub>SO<sub>4</sub> solution (0.5 mol/L, pH = 7.0) and 0.785 cm<sup>2</sup>, respectively.

**Table S1 The photocatalytic systems containing Co<sub>2</sub>P as a cocatalyst that have been reported in the literature.**

| Materials                                                                                         | Preparation method.                                        | Phosphorus source.                                                                  | Application                                                                                                   | Sacrificial agent.                                         | AQY [%]          | Results                                                                                                                                                                                                                                                                    | Ref.         |
|---------------------------------------------------------------------------------------------------|------------------------------------------------------------|-------------------------------------------------------------------------------------|---------------------------------------------------------------------------------------------------------------|------------------------------------------------------------|------------------|----------------------------------------------------------------------------------------------------------------------------------------------------------------------------------------------------------------------------------------------------------------------------|--------------|
| Co <sub>2</sub> P/CdS                                                                             | Solvotherma<br>l<br>method.                                | Tri-n-<br>octylphosphine<br>(TOP) and tri-<br>n-<br>octylphosphine<br>oxide (TOPO). | Photocatalytic<br>water splitting<br>under visible light<br>rradiation.                                       | DL-mandelic<br>acid.                                       | No               | The H <sub>2</sub> production rate can reach up to<br>19.3 μmol·h <sup>-1</sup> g <sup>-1</sup> after 10 h of LED<br>light irradiation and shows a<br>possibility for the utilization of the<br>holes in VB to synthesize<br>benzoylformic acid from DL-<br>mandelic acid. | <sup>1</sup> |
| O-Co <sub>2</sub> P/CdS                                                                           | Simple<br>calcination<br>method.                           | NaH <sub>2</sub> PO <sub>2</sub>                                                    | Photocatalytic<br>water splitting<br>under visible light<br>rradiation (λ > 420<br>nm).                       | Lactic acid                                                | 22.17<br>(420nm) | The optimal adding amount of o-Co <sub>2</sub> P<br>exhibits the highest H <sub>2</sub> evolution rate<br>of 184.48 mmol g <sup>-1</sup> h <sup>-1</sup> , which is<br>1.43 times higher than CdS/Co <sub>2</sub> P.                                                       | <sup>2</sup> |
| Co <sub>2</sub> P/CdS                                                                             | One-step<br>hydrotherma<br>lmethod                         | NaH <sub>2</sub> PO <sub>2</sub> ·H <sub>2</sub> O                                  | Photocatalytic<br>water splitting<br>under visible light<br>irradiation<br>(λ ≥ 420 nm)                       | Na <sub>2</sub> S and<br>Na <sub>2</sub> SO <sub>3</sub> . | 23.6<br>(420nm)  | The CdS/Co <sub>2</sub> P nanocomposites have a<br>mass of active sites and high-<br>efficiency photocatalytic splitting<br>water ability.                                                                                                                                 | <sup>3</sup> |
| H-Co <sub>2</sub> P-CdS                                                                           | One-step<br>hydrotherma<br>lmethod                         | Red<br>phosphorus                                                                   | Photocatalytic<br>water splitting<br>under visible light<br>irradiation<br>(λ ≥ 420 nm)                       | Lactic acid<br>and K <sub>2</sub> HPO <sub>4</sub>         | 13.88<br>(420nm) | The highest photocatalytic H <sub>2</sub><br>evolution rate of 0.356 mmol·h <sup>-1</sup> with<br>a good photocatalytic stability was<br>obtained by the sample of 1.2 mol%<br>H-Co <sub>2</sub> P-CdS, which is 41 times<br>higher than pure CdS                          | <sup>4</sup> |
| M <sub>2</sub> P (M =<br>Fe, Co, and<br>Ni)<br>hybridized<br>on S-C <sub>3</sub> N <sub>4</sub> . | Hydrotherm<br>al and<br>ultrasound<br>assisted<br>methods. | (NH <sub>4</sub> ) <sub>2</sub> HPO <sub>4</sub>                                    | Photocatalytic<br>water splitting<br>under visible light<br>irradiation (λ = 400,<br>440, 480, or 520<br>nm). | TEOA                                                       | No.              | Three as-prepared M <sub>2</sub> P can serve as<br>an efficient non-noble metal co-<br>catalyst for improving the H <sub>2</sub><br>generation on S-C <sub>3</sub> N <sub>4</sub> .                                                                                        | <sup>5</sup> |
| Co <sub>2</sub> P<br>nanocrystals                                                                 | Wet-<br>chemical                                           | Tri-n-<br>octylphosphine                                                            | Electrocatalysts for<br>H <sub>2</sub> evolution in both                                                      | In 1 M<br>KOH (or 0.5                                      | No               | The HB-Co <sub>2</sub> P NCs act as efficient<br>HER electrocatalysts, and perform                                                                                                                                                                                         | <sup>6</sup> |

|                                                                         |                                           |                                  |                                                                                      |                                          |    |                                                                                                                                                                                                                                                                                                                                                                                                         |
|-------------------------------------------------------------------------|-------------------------------------------|----------------------------------|--------------------------------------------------------------------------------------|------------------------------------------|----|---------------------------------------------------------------------------------------------------------------------------------------------------------------------------------------------------------------------------------------------------------------------------------------------------------------------------------------------------------------------------------------------------------|
| with 3D morphology                                                      | method.                                   | oxide (TOPO).                    | alkaline and acidic media.                                                           | M H <sub>2</sub> SO <sub>4</sub> )       |    | well in both of alkaline and acidic media.                                                                                                                                                                                                                                                                                                                                                              |
| 1D/2D Co <sub>2</sub> P/g-C <sub>3</sub> N <sub>4</sub> heterojunction. | A two-step ultrasonic irradiation method. | Tri-phenylphosphine (TPP).       | Photocatalytic water splitting under visible light irradiation ( $\lambda > 420$ nm) | TEOA                                     | No | The optimal 3% Co <sub>2</sub> P/g-C <sub>3</sub> N <sub>4</sub> sample reveals the best performance for H <sub>2</sub> generation, attaining a rate of 53.3 $\mu\text{mol h}^{-1} \text{g}^{-1}$ .                                                                                                                                                                                                     |
| Co <sub>2</sub> P/g-C <sub>3</sub> N <sub>4</sub>                       | A simple grinding method.                 | Na <sub>2</sub> HPO <sub>2</sub> | Photocatalytic water splitting under visible light irradiation,                      | TEOA and K <sub>2</sub> HPO <sub>4</sub> | No | The maximum H <sub>2</sub> evolution rate of the g-C <sub>3</sub> N <sub>4</sub> -Co <sub>2</sub> P-0.1M K <sub>2</sub> HPO <sub>4</sub> photocatalyst was 27.81 $\mu\text{mol h}^{-1}$ , furthermore, the optimized contents of 2 wt % Co <sub>2</sub> P and 0.1 mmol K <sub>2</sub> HPO <sub>4</sub> , which was about 561 times higher than that of pure g-C <sub>3</sub> N <sub>4</sub> nanosheets. |

**Table S2** The pore diameter and pore volume of different samples.

| composites              | pore diameter (nm) | pore volume (cm <sup>3</sup> g <sup>-1</sup> ) |
|-------------------------|--------------------|------------------------------------------------|
| RP                      | 2.586              | 0.262                                          |
| 2% Co <sub>2</sub> P/RP | 6.308              | 0.632                                          |

## References

1. S. Cao, Y. Chen, C.-C. Hou, X.-J. Lv and W.-F. Fu, *J. Mater. Chem. A*, 2015, **3**, 6096-6101.
2. Y. Chao, J. Zheng, H. Zhang, F. Li, F. Yan, Y. Tan and Z. Zhu, *Chen. Eng., J*, 2018, **346**, 281-288.
3. Y. He, R. Cui, C. Gao, J. Zhang and X. a. Li, *Mol. Catal.*, 2019, **469**, 161-166.
4. S. Li, L. Wang, S. Liu, B. Xu, N. Xiao, Y. Gao, W. Song, L. Ge and J. Liu, *ACS Sustainable Chem. & Eng.*, 2018, **6**, 9940-9950.
5. Z. Sun, M. Zhu, X. Lv, Y. Liu, C. Shi, Y. Dai, A. Wang and T. Majima, *Appl. Catal., B*, 2019, **246**, 330-336.
6. X. Wang, X. Tian, X. Duan, C. Wu, W. Pei, K. Wang, S. Yuan and Q. Wang, *RSC Adv.*, 2019, **9**, 20612-20617.
7. D. Zeng, W.-J. Ong, Y. Chen, S. Y. Tee, C. S. Chua, D.-L. Peng and M.-Y. Han, *Part. Part. Syst. Char.*, 2018, **35**, 1700251.
8. R. Shen, J. Xie, H. Zhang, A. Zhang, X. Chen and X. Li, *ACS Sustainable Chem. & Eng.*, 2017, **6**, 816-826.
